# Supplementary material
Source: publisher site journal article supplement (http://content.karger.com/ProdukteDB/miscArchiv/000/201/569/Suppl_table.pdf)
Supplement: Supplementary file 1 [file Suppl_table.pdf]

**Supplementary Table 1.** Mean fold change of miRNAs commonly expressed in human embryonic and lung cancer samples.

| <b>miRNAs expressed in both embryonic and lung tumor samples versus normal lung tissue</b> |                       |                           |                          |
|--------------------------------------------------------------------------------------------|-----------------------|---------------------------|--------------------------|
| <b>let-7 family</b>                                                                        | <b>Embryonic lung</b> | <b>NSCLC tumor tissue</b> | <b>SCLC tumor tissue</b> |
| let-7b                                                                                     | -1.1929931            | -0.3479575                | -0.2025167               |
| let-7c                                                                                     | -0.8522087            | -0.4130199                | -0.2685743               |
| let-7d                                                                                     | -0.5086674            | -0.2362546                | -0.0179009               |
| let-7f                                                                                     | -0.2150549            | -0.3085346                | -0.0981676               |
| let-7g                                                                                     | -0.3757957            | -0.1717609                | -0.3039373               |
| <b>miR-17-92 cluster</b>                                                                   |                       |                           |                          |
| miR-106a                                                                                   | 1.19349347            | 0.14439945                | 0.49438904               |
| miR-17-5p                                                                                  | 0.94049107            | 0.34159687                | 0.52982338               |
| miR-19a                                                                                    | 0.73541297            | 0.29114524                | 0.40351487               |
| miR-25                                                                                     | 0.79684558            | 0.28985846                | 0.4108875                |
| miR-93                                                                                     | 0.63700388            | 0.43757309                | 0.47922659               |
| <b>Others</b>                                                                              |                       |                           |                          |
| miR-221                                                                                    | 0.47832945            | 0.28399581                | 0.11815941               |
